# Supplementary material for: Growth and atomic oxygen erosion resistance of Al2O3-doped TiO2 thin film formed on polyimide by atomic layer deposition
Source: Royal Society of Chemistry journal article supplement (doi:10.1039/d4ra06464j), 2024-01-01
Supplement: d4ra06464j1.pdf [file d4ra06464j1.pdf]

## Supplementary material

### **Growth and atomic oxygen erosion resistance of Al<sub>2</sub>O<sub>3</sub>-doped TiO<sub>2</sub> thin film formed on polyimide by atomic layer deposition**

Chi Yan<sup>a</sup>, Jialin Li<sup>a</sup>, Haobo Wang<sup>a</sup>, Hua Tong<sup>a</sup>, Xiaojun Ye<sup>a</sup>, Kai Wang<sup>b</sup>, Xiao Yuan<sup>a</sup>,  
Cui Liu<sup>a\*</sup>, Hongbo Li<sup>a\*</sup>

<sup>a</sup> *School of Materials Science and Engineering, East China University of Science  
and Technology, Shanghai, 200237, China.*

<sup>b</sup> *College of Textiles, Donghua University, Shanghai 201620, China*

*\* Hongbo Li: lihongbo@ecust.edu.cn; \* Cui Liu: liucui78@126.com.*

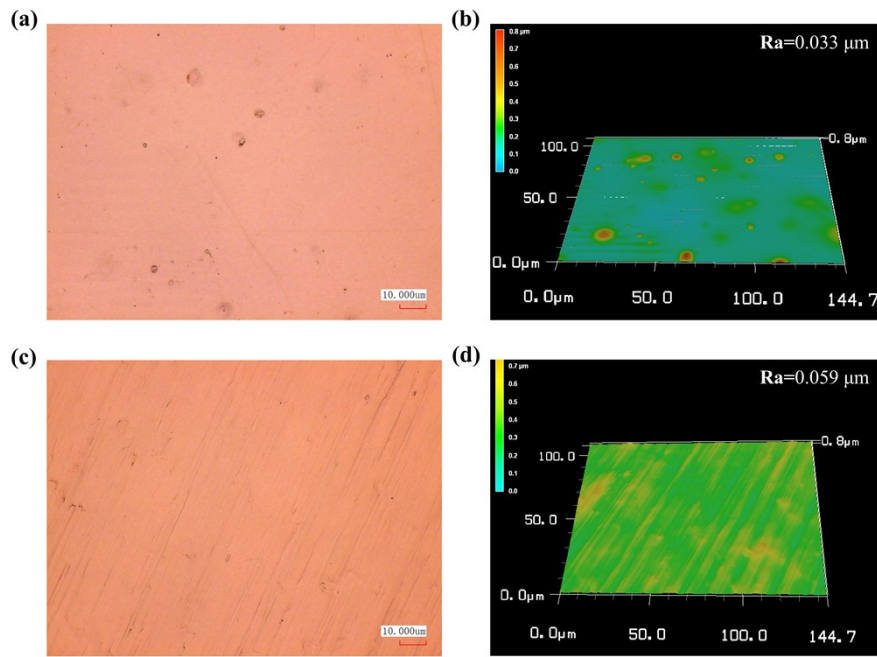

Figure S1. Optical microscope images of PI before and after NaOH activation:  
 (a) PI surface morphology. (b) PI 3D morphology.  
 (c) Activated-PI surface morphology. (d) Activated-PI 3D morphology.

FT-IR showed the chemical structures of the polyimide (PI) before and after alkaline activation (Figure. S2(a)). For example, the imide I band and II band are represented by the symmetrical and asymmetric stretching vibration peaks of the two carbonyl groups on the imine ring, which are found at 1776 and 1710  $\text{cm}^{-1}$ , respectively. The imide III band and IV band are represented by the imide ring's C-N stretching vibration peak at 1369  $\text{cm}^{-1}$  and vibration absorption at 720  $\text{cm}^{-1}$ , respectively <sup>1</sup>.

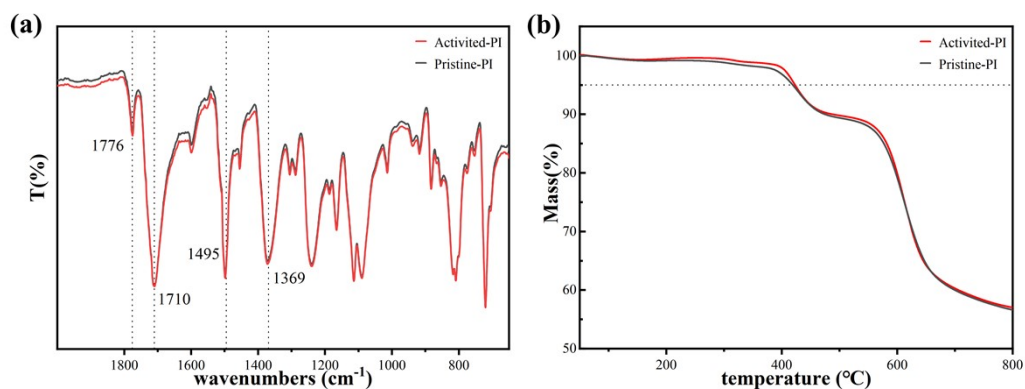

Figure S2. (a). The FT-IR analysis of PI before and after NaOH activation.  
 (b). The TG analysis of PI before and after NaOH activation

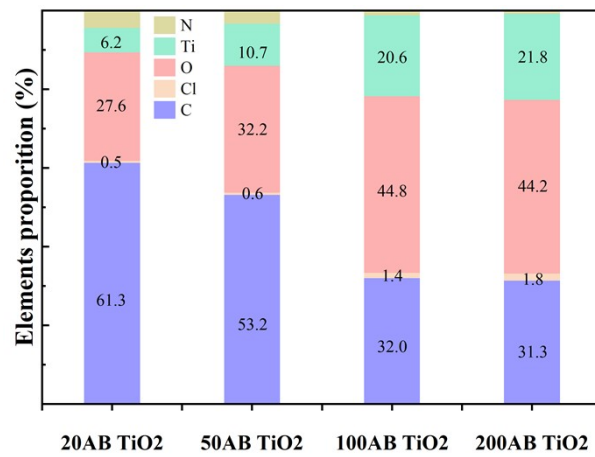

Figure S3. The Surface atomic proportions of PI after different ALD-TiO<sub>2</sub> cycles.

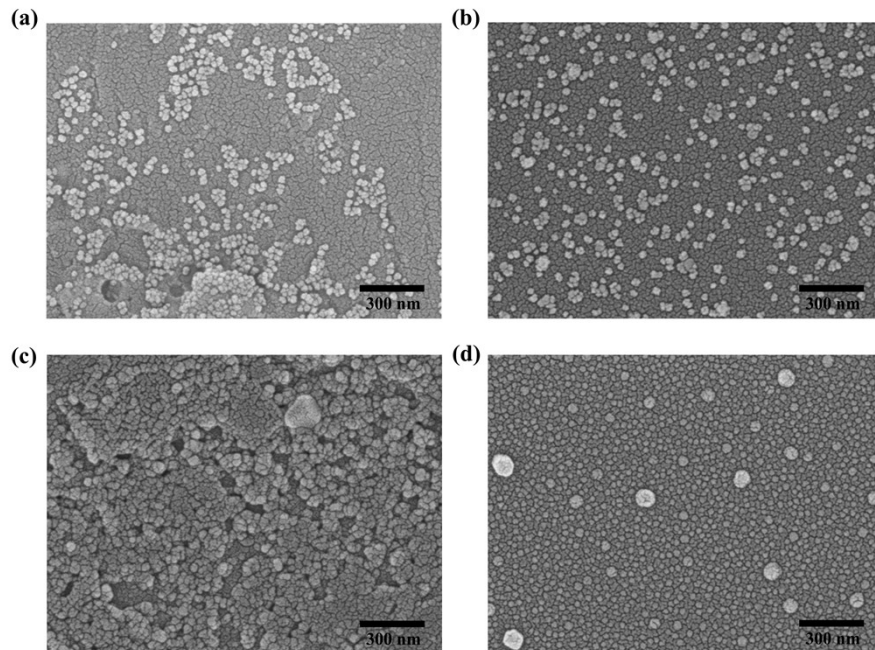

Figure S4. FESEM images of PI surface after different ALD-TiO<sub>2</sub> cycles:

- (a) 20 ALD-TiO<sub>2</sub> cycles. (b) 50 ALD-TiO<sub>2</sub> cycles.
- (c) 100 ALD-TiO<sub>2</sub> cycles. (d) 200 ALD-TiO<sub>2</sub> cycles.

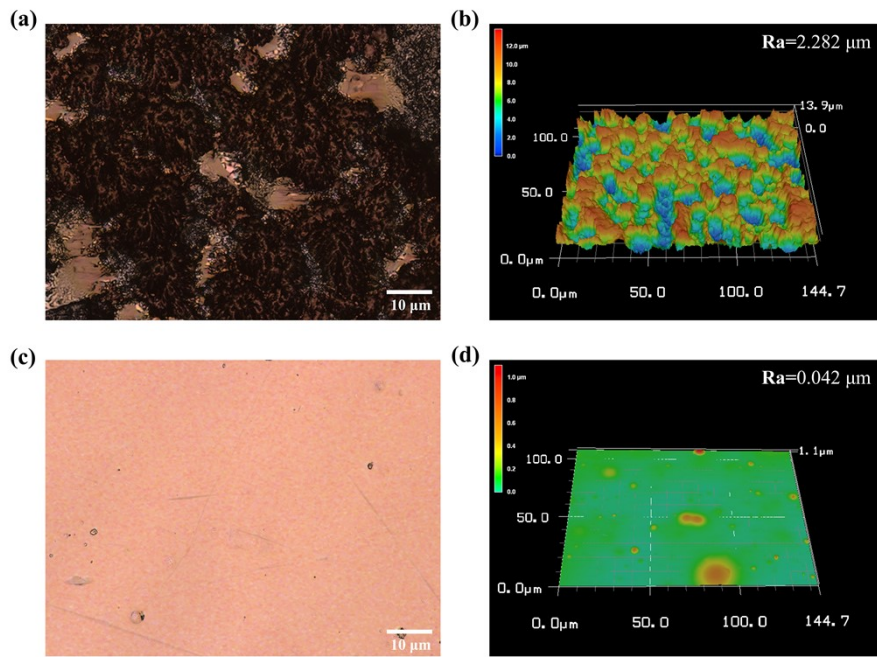

Figure S5. Optical microscope images of PI and of PI and 200AB ATO film coated PI after AO erosion:  
 (a) PI surface morphology. (b) PI 3D morphology.  
 (c) ATO@PI surface morphology. (d) ATO@PI 3D morphology.

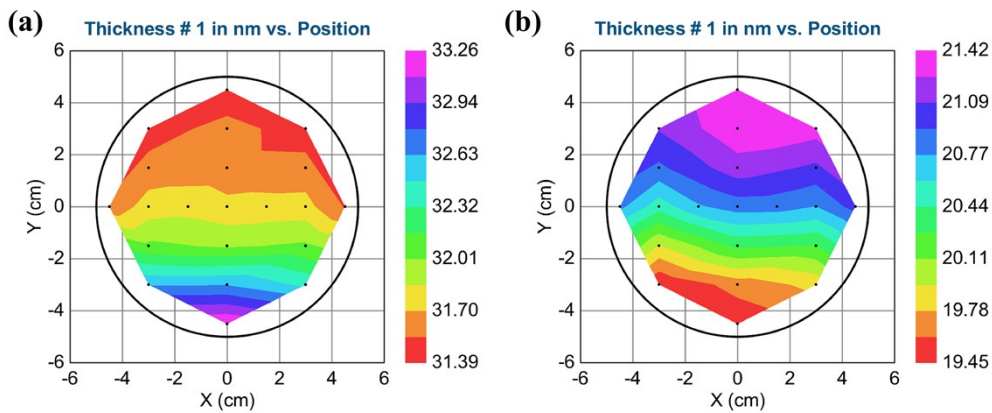

Figure S6. Thickness distribution of 300 ALD cycles films on the surface of silicon:  
 (a) 300 ALD- $\text{Al}_2\text{O}_3$  cycles. (b) 300 ALD- $\text{TiO}_2$  cycles.

The growth rate per cycle (GPC) at 100 °C is calculated by the growth thickness of  $\text{Al}_2\text{O}_3$  and  $\text{TiO}_2$  on the silicon wafer surface. As shown in Figure S6, after depositing 300 ALD cycles of  $\text{Al}_2\text{O}_3$  and  $\text{TiO}_2$ , the average thicknesses measured by ellipsometry on silicon wafers were 31.88 nm and 20.61 nm, respectively. Therefore, the growth rate of  $\text{Al}_2\text{O}_3$  and  $\text{TiO}_2$  at 100°C on our equipment were calculated as 0.106 nm/cycle and 0.069 nm/cycle, respectively. This result provides guidance for the growth of ALD films on polyimide surfaces.

## References

1. C.-P. Constantin, L. M. Gradinaru, O. Plopa and R.-D. Rusu, *Polymer Degradation and Stability*, 2022, DOI: 10.1016/j.polymdegradstab.2022.110036.
